# Supplementary material for: Determination of the Fatty Acid Profile and Lipid Quality Indices in Selected Infant Formulas
Source: MDPI journal article supplement (doi:10.3390/molecules29092044), 2024-04-29
Supplement: s1 [file s1]

**Table S1.** Characteristics of the women studied with age, weight and height, BMI, lactation time, and child height and weight.

| Characteristics                            | Mean   | SD    | Range     |
|--------------------------------------------|--------|-------|-----------|
| Age [years]                                | 26.6   | 3.5   | 21-33     |
| Body mass [kg]                             | 65.6   | 9.9   | 47-85     |
| Body height [m]                            | 1.64   | 0.06  | 1.51-1.75 |
| Body Mass Index (BMI) [kg/m <sup>2</sup> ] | 24.3   | 3.3   | 17.5-29.0 |
| Time of lactation [months]                 | 4.9    | 3.6   | 1-10      |
| Height of the child [cm]                   | 53.0   | 1.9   | 51-56     |
| Weight of the child [g]                    | 3288.9 | 615.7 | 2400-5100 |

**Table S2.** Characteristics of the women studied in terms of place of residence, lactation period, type of delivery held, and number of children born.

| Factors                 | n=53 |
|-------------------------|------|
| Place of residence      |      |
| City                    | 36   |
| Village                 | 17   |
| Stage of lactation      |      |
| I                       | 11   |
| II                      | 12   |
| III                     | 30   |
| Type of delivery        |      |
| Vaginal delivery        | 39   |
| Cesarean section        | 14   |
| Number of children born |      |
| 1                       | 33   |
| 2                       | 16   |
| >2                      | 4    |
